# Supplementary material for: Determination of solubility limit of Sn4+in fluorite structured terbia with simultaneous evaluation of photocatalytic function
Source: Royal Society of Chemistry journal article supplement (doi:10.1039/c6dt01372d), 2016-01-01
Supplement: c6dt01372d1.pdf [file c6dt01372d1.pdf]

*Electronic Supporting Information*

**Determination of solubility limit of Sn<sup>4+</sup> in fluorite structured terbia with simultaneous  
evaluation of photo catalytic function**

Vikash Kumar Tripathi and Rajamani Nagarajan\*

Materials Chemistry Group, Department of Chemistry

University of Delhi, Delhi-110007

INDIA

Mr. Vikash Kumar Tripathi: [vikastri25@gmail.com](mailto:vikastri25@gmail.com)

Professor Rajamani Nagarajan: [rnagarajan@chemistry.du.ac.in](mailto:rnagarajan@chemistry.du.ac.in) (\* Corresponding Author)

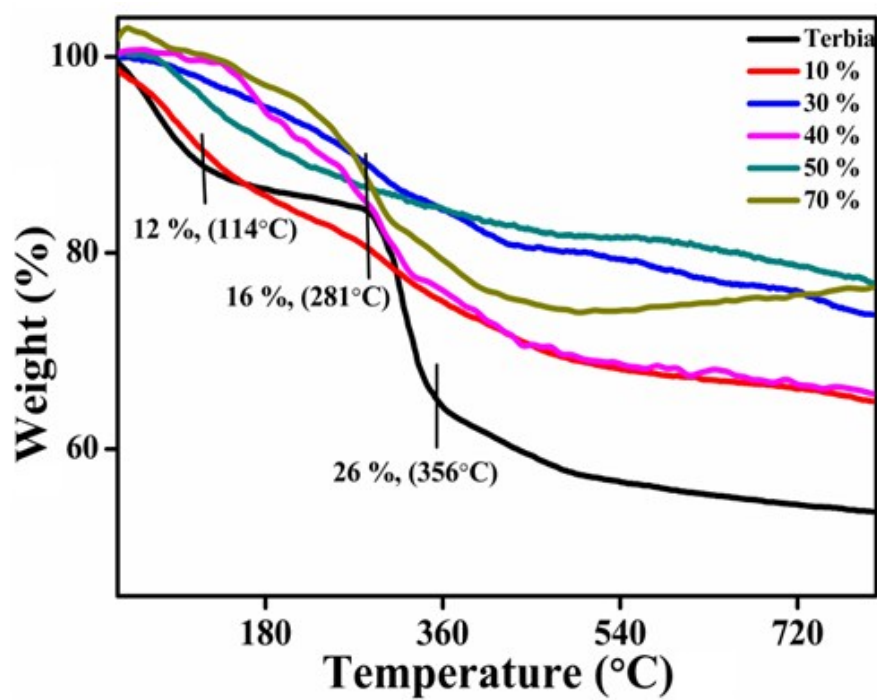

**Fig. S1** Thermo gravimetric traces of gels obtained from  $\text{TbCl}_3 \cdot 6\text{H}_2\text{O}$  (black) and 10, 30 and 40, 50 and 70 % tin substituted systems under flowing nitrogen atmosphere.

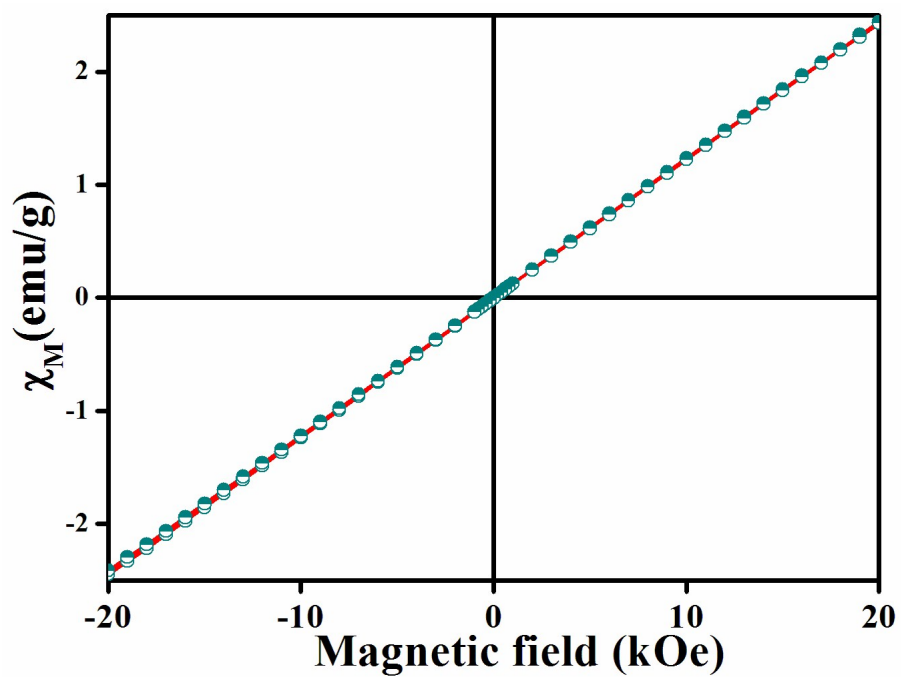

**Fig. S2** Plot of molar magnetic susceptibility versus the applied magnetic field of terbium sample at room temperature.

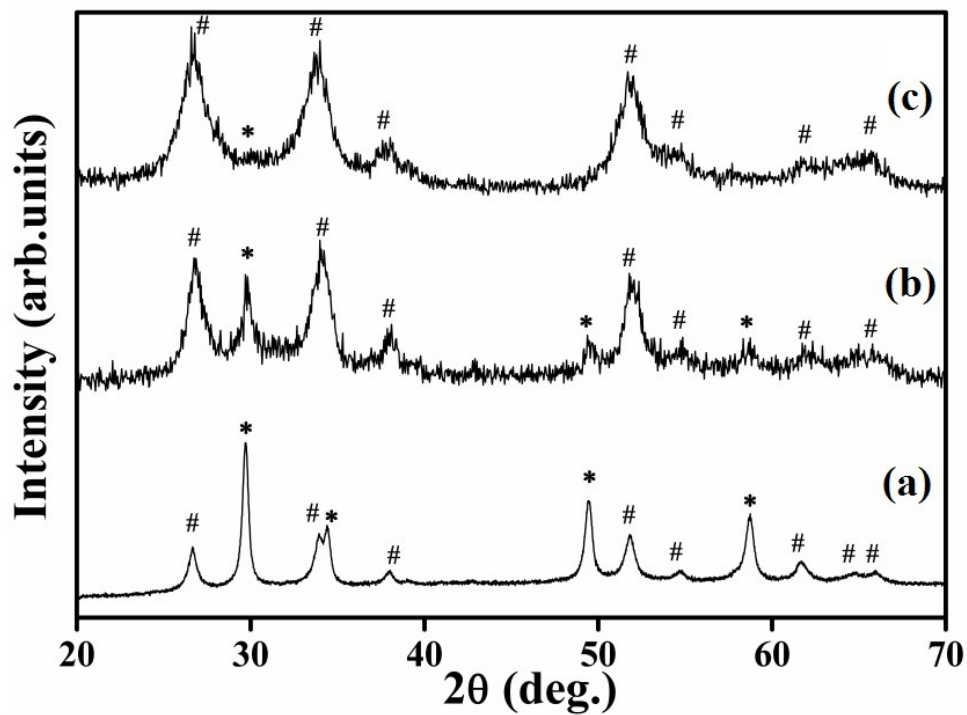

**Fig.S3** PXRD pattern of the sample from the calcinations of gel with composition of (a) 0.7:0.3 (b) 0.8:0.2 and (c) 0.9:0.1 mol % of chloride salts of terbium and tin, respectively at 800°C for 2 h. Reflections marked with \* # represent fluorite structured terbium and rutile form of SnO<sub>2</sub>.

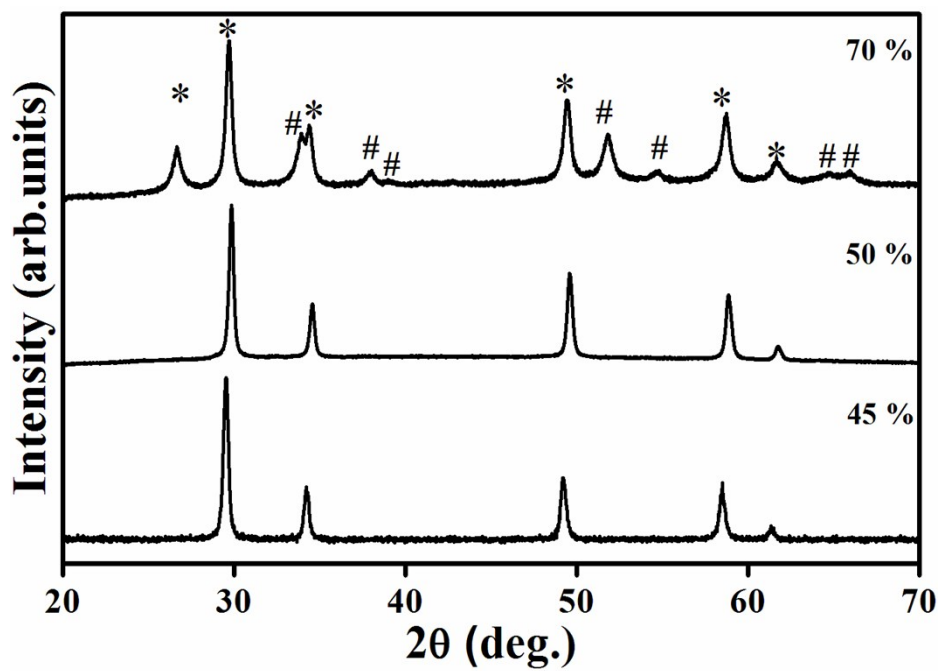

**Fig.S4** PXR D pattern of the sample from the calcinations of gel with a composition of 65:45, 50: 50 and 30:70 mol% of chloride salts of terbium and tin, respectively. Reflections marked with \* # represent fluorite structured terbia and rutile form of SnO<sub>2</sub>.

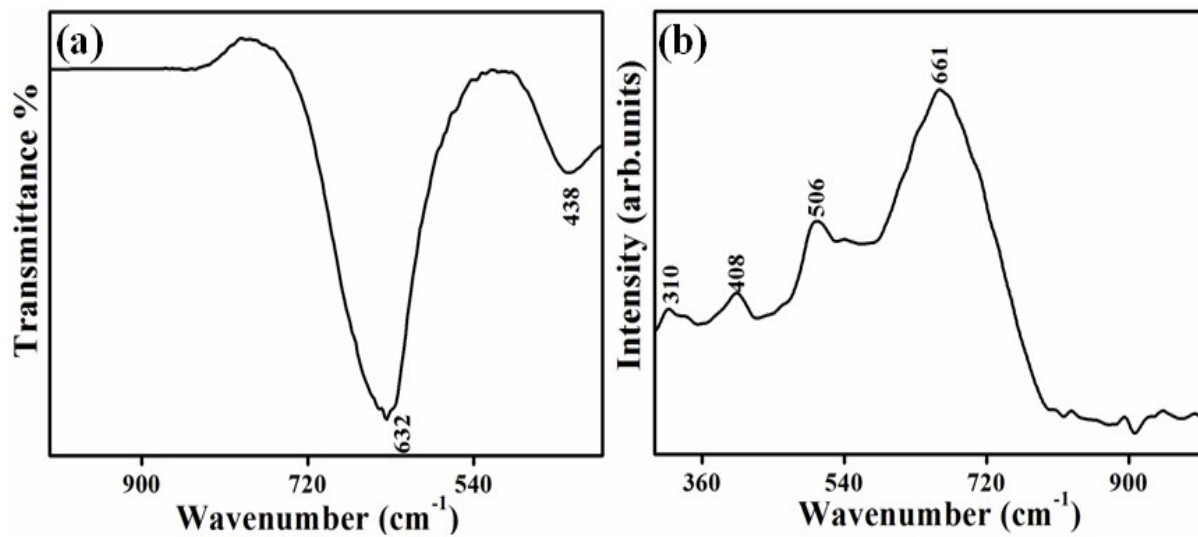

**Fig.S5** FTIR and Raman spectrum of the sample from the calcination of gel with a composition of 55:45 mol% of chloride salts of terbium and tin, respectively.

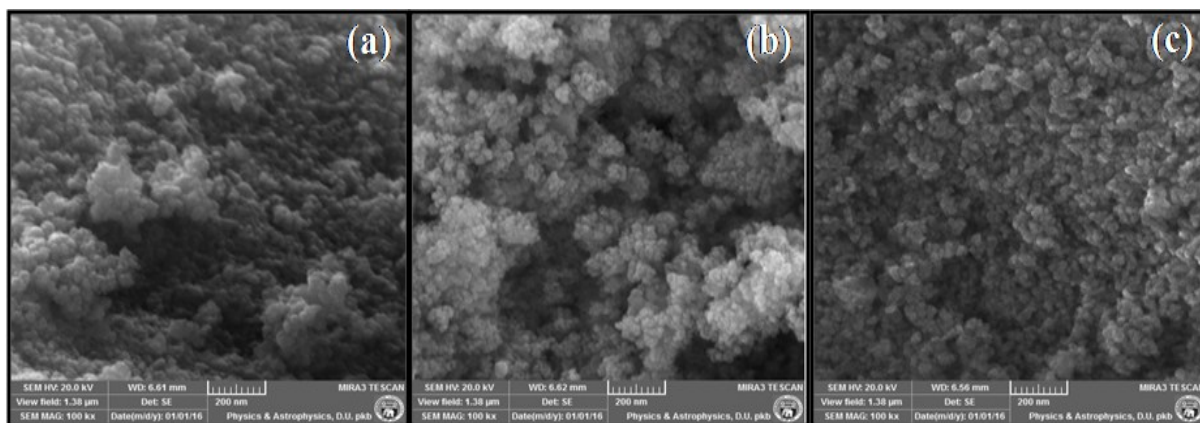

**Fig.S6** FESEM images of the calcined oxides from the gels obtained with 100, 90:10, and 70:30 of terbium and tin.

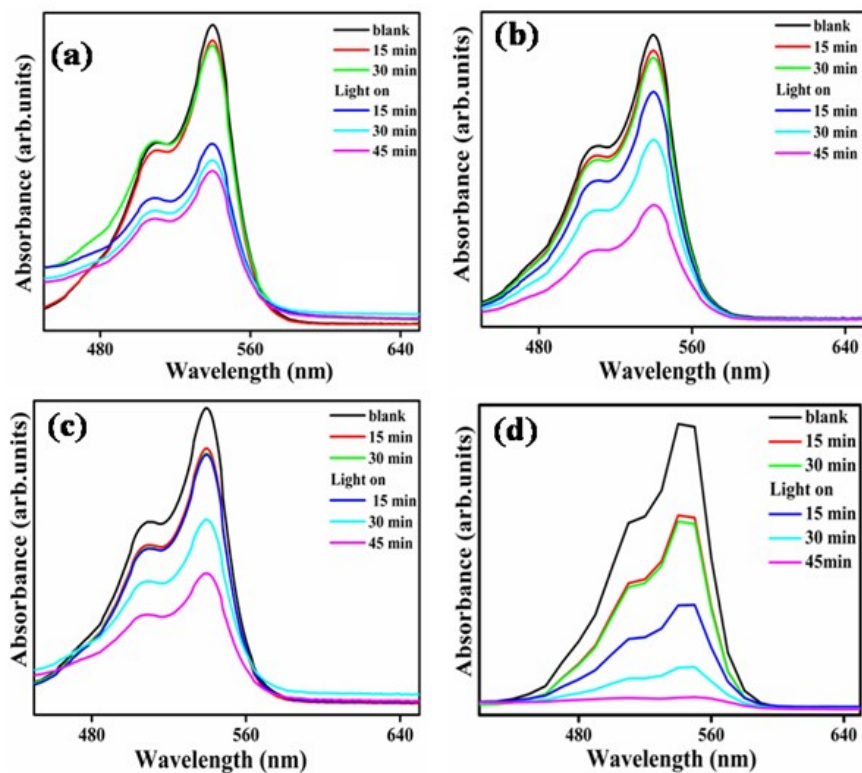

**Fig.S7** (a), (b), (c) and (d) represent the temporal changes in the absorbance spectra of aqueous Rhodamine-6G (Rh-6G) dye molecule with terbia, 10% Sn, 30% and 40% tin doped terbia.



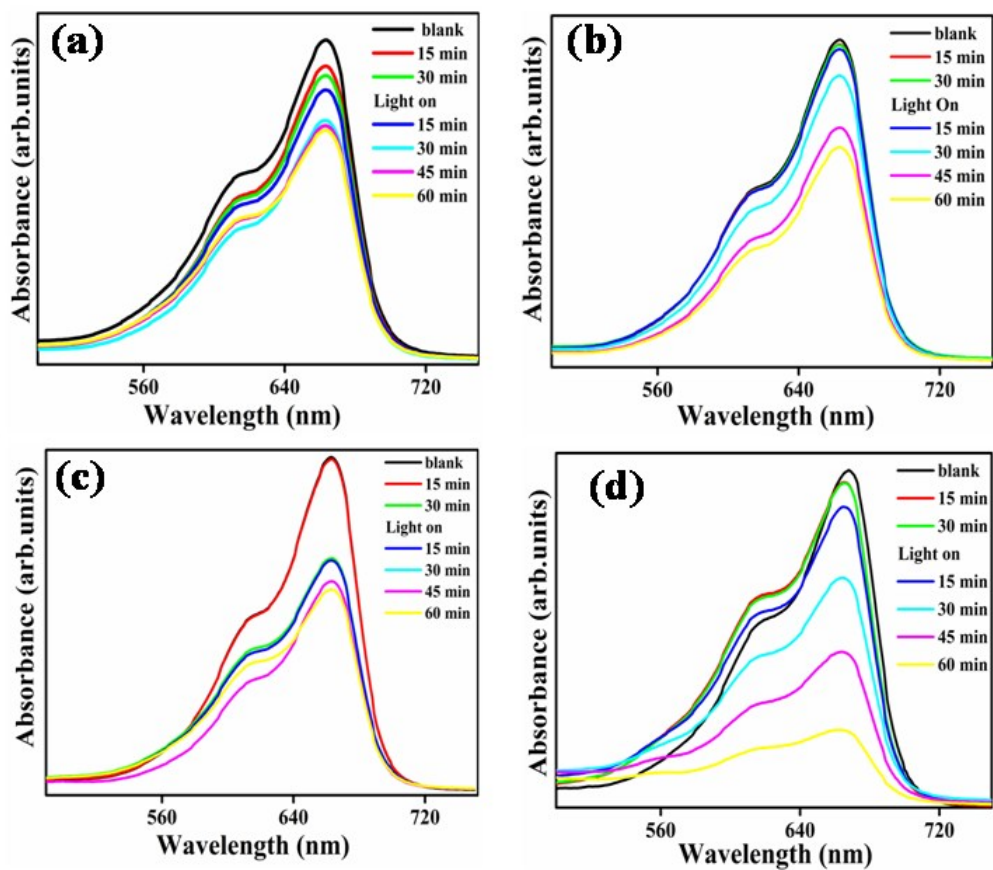

**Fig.S8** (a), (b), (c) and (d) represent the temporal changes in the absorbance spectra of aqueous Methylene Blue (MB) dye molecule with terbia, 10% Sn, 30% and 40% tin doped terbia.
